# Supplementary material for: Syntheses, crystal structures and magnetic properties of a novel family of penta-manganese complexes derived from an assembly system containing polydentate hydroxy-rich Schiff-base ligands
Source: Royal Society of Chemistry journal article supplement (doi:10.1039/c0dt00291g), 2010-01-01
Supplement: c0dt00291g.pdf [file c0dt00291g.pdf]

## **SUPPORTING INFORMATION**

### **Syntheses, crystal structures and magnetic properties of a novel family of penta-manganese complexes derived from an assembly system containing polydentate hydroxy-rich Schiff-base ligands**

Pei-Pei Yang, Xue-Yan Song, Rui-Na Liu, Li-Cun Li\* and Dai-Zheng Liao

Department of Chemistry, Nankai University, 94 Weijing Road, Tianjin 300071, PR  
China

\*Author to whom correspondance should be addressed. Email: [llicun@nankai.edu.cn](mailto:llicun@nankai.edu.cn)

**Table S1.** Selected Bond Lengths (Å) and Bond Angles (deg) for Complex 1.

|                   |            |                  |            |                   |            |
|-------------------|------------|------------------|------------|-------------------|------------|
| Mn(1)-O(5)        | 2.233(5)   | Mn(2)-O(10)      | 1.979(5)   | Mn(4)-O(2)        | 1.912(5)   |
| Mn(1)-O(6)        | 2.145(5)   | Mn(3)-O(9)       | 2.195(5)   | Mn(4)-N(1)        | 1.999(6)   |
| Mn(1)-O(15)       | 1.869(5)   | Mn(3)-O(5)       | 2.284(5)   | Mn(5)-O(13)       | 2.149(6)   |
| Mn(1)-O(16)       | 1.917(5)   | Mn(3)-O(4)       | 1.875(5)   | Mn(5)-O(12)       | 2.256(6)   |
| Mn(1)-O(14)       | 1.955(5)   | Mn(3)-O(3)       | 1.902(5)   | Mn(5)-O(15)       | 1.900(5)   |
| Mn(1)-N(3)        | 2.059(7)   | Mn(3)-O(16)      | 1.934(5)   | Mn(5)-O(7)        | 1.904(5)   |
| Mn(2)-O(2)        | 2.132(5)   | Mn(3)-N(2)       | 1.983(7)   | Mn(5)-O(8)        | 1.910(5)   |
| Mn(2)-O(4)        | 2.188(5)   | Mn(4)-O(8)       | 2.207(5)   | Mn(5)-N(4)        | 1.999(6)   |
| Mn(2)-O(15)       | 1.895(5)   | Mn(4)-O(17)      | 2.319(6)   | Mn(1)...Mn(2)     | 2.843(2)   |
| Mn(2)-O(16)       | 1.920(5)   | Mn(4)-O(1)       | 1.904(6)   | Mn(1)...Mn(3)     | 3.1589(16) |
| Mn(2)-O(11)       | 1.955(5)   | Mn(4)-O(6)       | 1.905(5)   | Mn(2)...Mn(3)     | 2.9333(16) |
| O(15)-Mn(1)-O(16) | 83.4(2)    | O(2)-Mn(2)-O(4)  | 170.26(19) | N(1)-Mn(4)-O(17)  | 88.8(2)    |
| O(15)-Mn(1)-O(14) | 98.5(2)    | O(4)-Mn(3)-O(3)  | 173.5(2)   | O(8)-Mn(4)-O(17)  | 177.9(2)   |
| O(16)-Mn(1)-O(14) | 171.7(2)   | O(4)-Mn(3)-O(16) | 86.7(2)    | O(15)-Mn(5)-O(7)  | 90.9(2)    |
| O(15)-Mn(1)-N(3)  | 169.8(2)   | O(3)-Mn(3)-O(16) | 99.5(2)    | O(15)-Mn(5)-O(8)  | 97.5(2)    |
| O(16)-Mn(1)-N(3)  | 91.9(2)    | O(4)-Mn(3)-N(2)  | 82.2(2)    | O(7)-Mn(5)-O(8)   | 171.2(2)   |
| O(14)-Mn(1)-N(3)  | 87.5(2)    | O(3)-Mn(3)-N(2)  | 91.8(3)    | O(15)-Mn(5)-N(4)  | 178.1(3)   |
| O(15)-Mn(1)-O(6)  | 91.4(2)    | O(16)-Mn(3)-N(2) | 168.5(2)   | O(7)-Mn(5)-N(4)   | 88.3(2)    |
| O(16)-Mn(1)-O(6)  | 94.2(2)    | O(4)-Mn(3)-O(9)  | 92.2(2)    | O(8)-Mn(5)-N(4)   | 83.3(2)    |
| O(14)-Mn(1)-O(6)  | 93.9(2)    | O(3)-Mn(3)-O(9)  | 90.2(2)    | O(15)-Mn(5)-O(13) | 91.5(2)    |
| N(3)-Mn(1)-O(6)   | 80.0(2)    | O(16)-Mn(3)-O(9) | 86.8(2)    | O(7)-Mn(5)-O(13)  | 89.8(2)    |
| O(15)-Mn(1)-O(5)  | 104.3(2)   | N(2)-Mn(3)-O(9)  | 91.0(2)    | O(8)-Mn(5)-O(13)  | 92.8(2)    |
| O(16)-Mn(1)-O(5)  | 80.9(2)    | O(4)-Mn(3)-O(5)  | 91.0(2)    | N(4)-Mn(5)-O(13)  | 90.2(2)    |
| O(14)-Mn(1)-O(5)  | 90.7(2)    | O(3)-Mn(3)-O(5)  | 88.1(2)    | O(15)-Mn(5)-O(12) | 95.0(2)    |
| N(3)-Mn(1)-O(5)   | 83.7(2)    | O(16)-Mn(3)-O(5) | 79.3(2)    | O(7)-Mn(5)-O(12)  | 87.3(2)    |
| O(6)-Mn(1)-O(5)   | 162.79(19) | N(2)-Mn(3)-O(5)  | 103.4(2)   | O(8)-Mn(5)-O(12)  | 89.1(2)    |
| O(15)-Mn(2)-O(16) | 82.6(2)    | O(9)-Mn(3)-O(5)  | 165.5(2)   | N(4)-Mn(5)-O(12)  | 83.2(2)    |
| O(15)-Mn(2)-O(11) | 99.1(2)    | O(1)-Mn(4)-O(6)  | 93.8(2)    | O(13)-Mn(5)-O(12) | 172.9(2)   |
| O(16)-Mn(2)-O(11) | 169.4(2)   | O(1)-Mn(4)-O(2)  | 170.0(2)   | Mn(1)-O(5)-Mn(3)  | 88.75(19)  |
| O(15)-Mn(2)-O(10) | 175.0(2)   | O(6)-Mn(4)-O(2)  | 94.5(2)    | Mn(3)-O(4)-Mn(2)  | 92.1(2)    |
| O(16)-Mn(2)-O(10) | 92.7(2)    | O(1)-Mn(4)-N(1)  | 89.0(2)    | Mn(4)-O(2)-Mn(2)  | 130.7(2)   |
| O(11)-Mn(2)-O(10) | 85.9(2)    | O(6)-Mn(4)-N(1)  | 176.0(2)   | Mn(4)-O(6)-Mn(1)  | 127.0(3)   |
| O(15)-Mn(2)-O(2)  | 88.5(2)    | O(2)-Mn(4)-N(1)  | 82.5(2)    | Mn(5)-O(8)-Mn(4)  | 123.8(2)   |
| O(16)-Mn(2)-O(2)  | 91.9(2)    | O(1)-Mn(4)-O(8)  | 92.0(2)    | Mn(1)-O(15)-Mn(2) | 98.1(2)    |
| O(11)-Mn(2)-O(2)  | 98.6(2)    | O(6)-Mn(4)-O(8)  | 89.5(2)    | Mn(1)-O(15)-Mn(5) | 129.7(3)   |
| O(10)-Mn(2)-O(2)  | 89.8(2)    | O(2)-Mn(4)-O(8)  | 93.7(2)    | Mn(2)-O(15)-Mn(5) | 125.4(3)   |
| O(15)-Mn(2)-O(4)  | 92.9(2)    | N(1)-Mn(4)-O(8)  | 93.3(2)    | Mn(1)-O(16)-Mn(2) | 95.6(2)    |
| O(16)-Mn(2)-O(4)  | 78.73(19)  | O(1)-Mn(4)-O(17) | 87.9(3)    | Mn(1)-O(16)-Mn(3) | 110.2(2)   |
| O(11)-Mn(2)-O(4)  | 90.7(2)    | O(6)-Mn(4)-O(17) | 88.3(2)    | Mn(2)-O(16)-Mn(3) | 99.1(2)    |
| O(10)-Mn(2)-O(4)  | 88.0(2)    | O(2)-Mn(4)-O(17) | 86.7(2)    |                   |            |

**Table S2.** Selected Bond Lengths (Å) and Bond Angles (deg) for Complex 2.

|                   |          |                   |          |                   |            |
|-------------------|----------|-------------------|----------|-------------------|------------|
| Mn(1)-O(16)       | 1.896(6) | Mn(2)-O(3)        | 2.329(6) | Mn(4)-O(8)        | 2.174(5)   |
| Mn(1)-O(15)       | 1.922(5) | Mn(3)-O(16)       | 1.890(5) | Mn(4)-O(17)       | 2.324(6)   |
| Mn(1)-O(10)       | 1.937(5) | Mn(3)-O(15)       | 1.910(6) | Mn(5)-O(7)        | 1.900(6)   |
| Mn(1)-O(11)       | 1.978(6) | Mn(3)-O(13)       | 1.942(6) | Mn(5)-O(8)        | 1.912(6)   |
| Mn(1)-O(6)        | 2.141(6) | Mn(3)-N(2)        | 2.058(6) | Mn(5)-O(16)       | 1.917(5)   |
| Mn(1)-O(2)        | 2.177(6) | Mn(3)-O(4)        | 2.168(5) | Mn(5)-N(4)        | 2.026(7)   |
| Mn(2)-O(2)        | 1.866(5) | Mn(3)-O(3)        | 2.197(5) | Mn(5)-O(14)       | 2.182(7)   |
| Mn(2)-O(1)        | 1.899(5) | Mn(4)-O(4)        | 1.887(5) | Mn(5)-O(9)        | 2.243(6)   |
| Mn(2)-O(15)       | 1.945(5) | Mn(4)-O(5)        | 1.914(6) | Mn(1)···Mn(2)     | 2.9682(19) |
| Mn(2)-N(1)        | 1.980(7) | Mn(4)-O(6)        | 1.918(6) | Mn(2)···Mn(3)     | 3.150(2)   |
| Mn(2)-O(12)       | 2.199(6) | Mn(4)-N(3)        | 1.990(7) | Mn(1)···Mn(3)     | 2.8237(19) |
| O(16)-Mn(1)-O(15) | 84.0(2)  | O(12)-Mn(2)-O(3)  | 165.2(2) | N(3)-Mn(4)-O(17)  | 89.2(3)    |
| O(16)-Mn(1)-O(10) | 97.8(2)  | O(16)-Mn(3)-O(15) | 84.5(2)  | O(8)-Mn(4)-O(17)  | 179.7(3)   |
| O(15)-Mn(1)-O(10) | 168.2(2) | O(16)-Mn(3)-O(13) | 98.9(2)  | O(7)-Mn(5)-O(8)   | 170.6(2)   |
| O(16)-Mn(1)-O(11) | 175.4(2) | O(15)-Mn(3)-O(13) | 173.5(2) | O(7)-Mn(5)-O(16)  | 92.1(2)    |
| O(15)-Mn(1)-O(11) | 91.9(2)  | O(16)-Mn(3)-N(2)  | 170.4(2) | O(8)-Mn(5)-O(16)  | 97.3(2)    |
| O(10)-Mn(1)-O(11) | 86.6(2)  | O(15)-Mn(3)-N(2)  | 93.4(3)  | O(7)-Mn(5)-N(4)   | 88.4(3)    |
| O(16)-Mn(1)-O(6)  | 89.9(2)  | O(13)-Mn(3)-N(2)  | 84.2(3)  | O(8)-Mn(5)-N(4)   | 82.3(3)    |
| O(15)-Mn(1)-O(6)  | 92.1(2)  | O(16)-Mn(3)-O(4)  | 90.6(2)  | O(16)-Mn(5)-N(4)  | 178.9(3)   |
| O(10)-Mn(1)-O(6)  | 99.6(2)  | O(15)-Mn(3)-O(4)  | 92.5(2)  | O(7)-Mn(5)-O(14)  | 91.5(3)    |
| O(11)-Mn(1)-O(6)  | 88.1(2)  | O(13)-Mn(3)-O(4)  | 93.0(2)  | O(8)-Mn(5)-O(14)  | 89.2(3)    |
| O(16)-Mn(1)-O(2)  | 94.6(2)  | N(2)-Mn(3)-O(4)   | 80.1(2)  | O(16)-Mn(5)-O(14) | 92.4(2)    |
| O(15)-Mn(1)-O(2)  | 77.8(2)  | O(16)-Mn(3)-O(3)  | 105.0(2) | N(4)-Mn(5)-O(14)  | 86.6(3)    |
| O(10)-Mn(1)-O(2)  | 90.5(2)  | O(15)-Mn(3)-O(3)  | 82.9(2)  | O(7)-Mn(5)-O(9)   | 85.6(2)    |
| O(11)-Mn(1)-O(2)  | 86.7(2)  | O(13)-Mn(3)-O(3)  | 90.8(2)  | O(8)-Mn(5)-O(9)   | 92.6(2)    |
| O(6)-Mn(1)-O(2)   | 168.4(2) | N(2)-Mn(3)-O(3)   | 83.9(2)  | O(16)-Mn(5)-O(9)  | 94.0(2)    |
| O(2)-Mn(2)-O(1)   | 173.5(2) | O(4)-Mn(3)-O(3)   | 163.1(2) | N(4)-Mn(5)-O(9)   | 87.0(3)    |
| O(2)-Mn(2)-O(15)  | 85.2(2)  | O(4)-Mn(4)-O(5)   | 94.1(3)  | O(14)-Mn(5)-O(9)  | 173.1(2)   |
| O(1)-Mn(2)-O(15)  | 101.3(2) | O(4)-Mn(4)-O(6)   | 94.3(3)  | Mn(2)-O(2)-Mn(1)  | 94.1(2)    |
| O(2)-Mn(2)-N(1)   | 82.8(3)  | O(5)-Mn(4)-O(6)   | 169.6(3) | Mn(3)-O(3)-Mn(2)  | 88.1(2)    |
| O(1)-Mn(2)-N(1)   | 90.7(3)  | O(4)-Mn(4)-N(3)   | 176.3(3) | Mn(4)-O(4)-Mn(3)  | 127.8(3)   |
| O(15)-Mn(2)-N(1)  | 167.6(3) | O(5)-Mn(4)-N(3)   | 88.8(3)  | Mn(4)-O(6)-Mn(1)  | 129.0(3)   |
| O(2)-Mn(2)-O(12)  | 90.0(2)  | O(6)-Mn(4)-N(3)   | 82.6(3)  | Mn(5)-O(8)-Mn(4)  | 125.2(3)   |
| O(1)-Mn(2)-O(12)  | 90.7(2)  | O(4)-Mn(4)-O(8)   | 91.6(2)  | Mn(3)-O(15)-Mn(1) | 94.9(2)    |
| O(15)-Mn(2)-O(12) | 86.5(2)  | O(5)-Mn(4)-O(8)   | 92.2(2)  | Mn(3)-O(15)-Mn(2) | 109.6(3)   |
| N(1)-Mn(2)-O(12)  | 96.7(3)  | O(6)-Mn(4)-O(8)   | 93.7(2)  | Mn(1)-O(15)-Mn(2) | 100.3(2)   |
| O(2)-Mn(2)-O(3)   | 90.7(2)  | N(3)-Mn(4)-O(8)   | 90.6(3)  | Mn(3)-O(16)-Mn(1) | 96.5(2)    |
| O(1)-Mn(2)-O(3)   | 90.4(2)  | O(4)-Mn(4)-O(17)  | 88.5(2)  | Mn(3)-O(16)-Mn(5) | 129.2(3)   |
| O(15)-Mn(2)-O(3)  | 78.8(2)  | O(5)-Mn(4)-O(17)  | 88.1(2)  | Mn(1)-O(16)-Mn(5) | 126.8(3)   |
| N(1)-Mn(2)-O(3)   | 98.1(3)  | O(6)-Mn(4)-O(17)  | 86.0(2)  |                   |            |

**Table S3.** Selected Bond Lengths (Å) and Bond Angles (deg) for Complex 3.

|                   |          |                   |          |                   |          |
|-------------------|----------|-------------------|----------|-------------------|----------|
| Mn(1)-O(2)        | 1.854(6) | Mn(2)-O(14)       | 2.102(7) | Mn(4)-O(8)        | 1.944(6) |
| Mn(1)-O(1)        | 1.876(6) | Mn(2)-O(6)        | 2.400(7) | Mn(4)-N(3)        | 1.979(8) |
| Mn(1)-O(5)        | 1.929(6) | Mn(3)-O(16)       | 2.118(6) | Mn(4)-O(19)       | 2.090(6) |
| Mn(1)-N(1)        | 1.991(7) | Mn(3)-O(11)       | 2.141(6) | Mn(4)-O(9)        | 2.471(7) |
| Mn(1)-O(15)       | 2.189(7) | Mn(3)-O(17)       | 2.144(7) | Mn(5)-O(11)       | 1.851(6) |
| Mn(1)-O(13)       | 2.194(8) | Mn(3)-O(2)        | 2.145(6) | Mn(5)-O(10)       | 1.867(6) |
| Mn(2)-O(12)       | 1.833(6) | Mn(3)-O(12)       | 2.198(6) | Mn(5)-O(8)        | 1.933(6) |
| Mn(2)-O(4)        | 1.878(6) | Mn(3)-O(3)        | 2.209(6) | Mn(5)-N(4)        | 1.960(8) |
| Mn(2)-O(5)        | 1.937(6) | Mn(4)-O(3)        | 1.830(6) | Mn(5)-O(20)       | 2.169(6) |
| Mn(2)-N(2)        | 1.989(8) | Mn(4)-O(7)        | 1.868(6) | Mn(5)-O(18)       | 2.286(7) |
| O(2)-Mn(1)-O(1)   | 173.7(3) | O(5)-Mn(2)-O(6)   | 73.3(2)  | N(3)-Mn(4)-O(19)  | 96.6(3)  |
| O(2)-Mn(1)-O(5)   | 91.2(3)  | N(2)-Mn(2)-O(6)   | 81.4(3)  | O(3)-Mn(4)-O(9)   | 87.9(3)  |
| O(1)-Mn(1)-O(5)   | 94.5(3)  | O(14)-Mn(2)-O(6)  | 166.4(3) | O(7)-Mn(4)-O(9)   | 100.9(3) |
| O(2)-Mn(1)-N(1)   | 83.6(3)  | O(16)-Mn(3)-O(11) | 141.3(3) | O(8)-Mn(4)-O(9)   | 71.7(2)  |
| O(1)-Mn(1)-N(1)   | 91.0(3)  | O(16)-Mn(3)-O(17) | 82.9(3)  | N(3)-Mn(4)-O(9)   | 74.8(3)  |
| O(5)-Mn(1)-N(1)   | 171.9(3) | O(11)-Mn(3)-O(17) | 92.7(2)  | O(19)-Mn(4)-O(9)  | 162.0(2) |
| O(2)-Mn(1)-O(15)  | 94.3(3)  | O(16)-Mn(3)-O(2)  | 90.5(2)  | O(11)-Mn(5)-O(10) | 173.9(3) |
| O(1)-Mn(1)-O(15)  | 88.4(3)  | O(11)-Mn(3)-O(2)  | 115.9(2) | O(11)-Mn(5)-O(8)  | 90.3(3)  |
| O(5)-Mn(1)-O(15)  | 87.9(3)  | O(17)-Mn(3)-O(2)  | 139.0(2) | O(10)-Mn(5)-O(8)  | 95.8(3)  |
| N(1)-Mn(1)-O(15)  | 86.3(3)  | O(16)-Mn(3)-O(12) | 141.0(2) | O(11)-Mn(5)-N(4)  | 83.3(3)  |
| O(2)-Mn(1)-O(13)  | 89.8(3)  | O(11)-Mn(3)-O(12) | 74.9(2)  | O(10)-Mn(5)-N(4)  | 90.6(3)  |
| O(1)-Mn(1)-O(13)  | 87.6(3)  | O(17)-Mn(3)-O(12) | 80.9(3)  | O(8)-Mn(5)-N(4)   | 171.5(3) |
| O(5)-Mn(1)-O(13)  | 91.4(3)  | O(2)-Mn(3)-O(12)  | 79.3(2)  | O(11)-Mn(5)-O(20) | 92.8(3)  |
| N(1)-Mn(1)-O(13)  | 94.8(3)  | O(16)-Mn(3)-O(3)  | 82.2(2)  | O(10)-Mn(5)-O(20) | 87.0(3)  |
| O(15)-Mn(1)-O(13) | 175.8(3) | O(11)-Mn(3)-O(3)  | 78.7(2)  | O(8)-Mn(5)-O(20)  | 93.0(2)  |
| O(12)-Mn(2)-O(4)  | 91.4(3)  | O(17)-Mn(3)-O(3)  | 143.1(3) | N(4)-Mn(5)-O(20)  | 92.9(3)  |
| O(12)-Mn(2)-O(5)  | 96.2(3)  | O(2)-Mn(3)-O(3)   | 74.6(2)  | O(11)-Mn(5)-O(18) | 94.0(3)  |
| O(4)-Mn(2)-O(5)   | 167.4(3) | O(12)-Mn(3)-O(3)  | 129.3(2) | O(10)-Mn(5)-O(18) | 86.4(3)  |
| O(12)-Mn(2)-N(2)  | 169.5(3) | O(3)-Mn(4)-O(7)   | 90.8(3)  | O(8)-Mn(5)-O(18)  | 85.4(2)  |
| O(4)-Mn(2)-N(2)   | 88.4(3)  | O(3)-Mn(4)-O(8)   | 94.5(3)  | N(4)-Mn(5)-O(18)  | 89.5(3)  |
| O(5)-Mn(2)-N(2)   | 82.3(3)  | O(7)-Mn(4)-O(8)   | 170.7(3) | O(20)-Mn(5)-O(18) | 173.0(3) |
| O(12)-Mn(2)-O(14) | 97.4(3)  | O(3)-Mn(4)-N(3)   | 162.4(3) | Mn(1)-O(2)-Mn(3)  | 119.6(3) |
| O(4)-Mn(2)-O(14)  | 95.4(3)  | O(7)-Mn(4)-N(3)   | 89.8(3)  | Mn(4)-O(3)-Mn(3)  | 123.7(3) |
| O(5)-Mn(2)-O(14)  | 93.6(3)  | O(8)-Mn(4)-N(3)   | 82.9(3)  | Mn(1)-O(5)-Mn(2)  | 127.6(3) |
| N(2)-Mn(2)-O(14)  | 93.1(3)  | O(3)-Mn(4)-O(19)  | 100.9(3) | Mn(5)-O(8)-Mn(4)  | 127.1(3) |
| O(12)-Mn(2)-O(6)  | 88.2(3)  | O(7)-Mn(4)-O(19)  | 94.7(3)  | Mn(5)-O(11)-Mn(3) | 118.7(3) |
| O(4)-Mn(2)-O(6)   | 96.9(3)  | O(8)-Mn(4)-O(19)  | 91.8(2)  | Mn(2)-O(12)-Mn(3) | 124.4(3) |

**Table S4.** Selected Bond Lengths (Å) and Bond Angles (deg) for Complex 4.

|                     |           |                   |           |                      |           |
|---------------------|-----------|-------------------|-----------|----------------------|-----------|
| Mn(1)-O(19)         | 2.139(9)  | Mn(2)-O(18)       | 2.122(12) | Mn(4)-N(3)           | 1.949(11) |
| Mn(1)-O(2)          | 2.146(10) | Mn(2)-O(15)       | 2.172(11) | Mn(4)-O(8)           | 1.975(10) |
| Mn(1)-O(13)         | 2.155(11) | Mn(3)-O(12)       | 1.818(9)  | Mn(4)-O(21)          | 2.083(10) |
| Mn(1)-O(16)         | 2.237(11) | Mn(3)-O(4)        | 1.855(12) | Mn(4)-O(9)           | 2.403(10) |
| Mn(1)-O(3)          | 2.267(10) | Mn(3)-N(2)        | 1.957(14) | Mn(5)-O(19)          | 1.866(9)  |
| Mn(1)-O(12)         | 2.280(11) | Mn(3)-O(5)        | 1.971(11) | Mn(5)-O(10)          | 1.873(10) |
| Mn(2)-O(1)          | 1.854(10) | Mn(3)-O(17)       | 2.108(12) | Mn(5)-O(8)           | 1.946(10) |
| Mn(2)-O(2)          | 1.872(9)  | Mn(3)-O(6)        | 2.364(12) | Mn(5)-N(4)           | 1.995(13) |
| Mn(2)-O(5)          | 1.957(11) | Mn(4)-O(3)        | 1.839(9)  | Mn(5)-O(20)          | 2.168(11) |
| Mn(2)-N(1)          | 1.965(15) | Mn(4)-O(7)        | 1.877(10) | Mn(5)-O(14)          | 2.259(11) |
| O(19)-Mn(1)-O ( 2 ) | 113.4(4)  | O(5)-Mn(2)-O(15)  | 90.0(4)   | O(8)-Mn(4)-O(21)     | 94.8(4)   |
| O(19)-Mn(1)-O(13)   | 93.3(4)   | N(1)-Mn(2)-O(15)  | 91.2(5)   | O(3)-Mn(4)-O(9)      | 89.4(4)   |
| O(2)-Mn(1)-O(13)    | 140.4(4)  | O(18)-Mn(2)-O(15) | 174.3(4)  | O(7)-Mn(4)-O(9)      | 98.5(4)   |
| O(19)-Mn(1)-O(16)   | 142.0(4)  | O(12)-Mn(3)-O(4)  | 92.1(5)   | N(3)-Mn(4)-O(9)      | 79.7(4)   |
| O(2)-Mn(1)-O(16)    | 92.5(4)   | O(12)-Mn(3)-N(2)  | 171.7(6)  | O(8)-Mn(4)-O(9)      | 72.9(4)   |
| O(13)-Mn(1)-O(16)   | 81.7(4)   | O(4)-Mn(3)-N(2)   | 89.3(6)   | O(21)-Mn(4)-O(9)     | 166.3(4)  |
| O(19)-Mn(1)-O(3)    | 80.5(4)   | O(12)-Mn(3)-O(5)  | 94.6(5)   | O(19)-Mn(5)-O(10)    | 174.7(4)  |
| O(2)-Mn(1)-O(3)     | 73.2(4)   | O(4)-Mn(3)-O(5)   | 165.5(5)  | O(19)-Mn(5)-O(8)     | 89.5(4)   |
| O(13)-Mn(1)-O(3)    | 142.8(4)  | N(2)-Mn(3)-O(5)   | 82.2(5)   | O(10)-Mn(5)-O(8)     | 95.8(4)   |
| O(16)-Mn(1)-O(3)    | 81.2(4)   | O(12)-Mn(3)-O(17) | 95.8(5)   | O(19)-Mn(5)-N(4)     | 84.4(5)   |
| O(19)-Mn(1)-O(12)   | 72.1(3)   | O(4)-Mn(3)-O(17)  | 94.9(5)   | O(10)-Mn(5)-N(4)     | 90.3(5)   |
| O(2)-Mn(1)-O(12)    | 80.8(4)   | N(2)-Mn(3)-O(17)  | 92.3(5)   | O(8)-Mn(5)-N(4)      | 172.6(4)  |
| O(13)-Mn(1)-O(12)   | 80.5(4)   | O(5)-Mn(3)-O(17)  | 97.2(5)   | O(19)-Mn(5)-O(20)    | 88.5(4)   |
| O(16)-Mn(1)-O(12)   | 142.3(4)  | O(12)-Mn(3)-O(6)  | 89.1(4)   | O(10)-Mn(5)-O(20)    | 91.6(4)   |
| O(3)-Mn(1)-O(12)    | 130.4(4)  | O(4)-Mn(3)-O(6)   | 94.1(5)   | O(8)-Mn(5)-O(20)     | 94.2(4)   |
| O(1)-Mn(2)-O(2)     | 173.8(5)  | N(2)-Mn(3)-O(6)   | 82.6(5)   | N(4)-Mn(5)-O(20)     | 89.9(5)   |
| O(1)-Mn(2)-O(5)     | 95.6(4)   | O(5)-Mn(3)-O(6)   | 73.3(4)   | O(19)-Mn(5)-O(14)    | 92.2(4)   |
| O(2)-Mn(2)-O(5)     | 90.6(4)   | O(17)-Mn(3)-O(6)  | 169.6(5)  | O(10)-Mn(5)-O(14)    | 87.6(4)   |
| O(1)-Mn(2)-N(1)     | 89.5(5)   | O(3)-Mn(4)-O(7)   | 92.0(4)   | O(8)-Mn(5)-O(14)     | 86.3(4)   |
| O(2)-Mn(2)-N(1)     | 84.3(5)   | O(3)-Mn(4)-N(3)   | 169.1(5)  | N(4)-Mn(5)-O(14)     | 89.7(5)   |
| O(5)-Mn(2)-N(1)     | 174.8(5)  | O(7)-Mn(4)-N(3)   | 90.2(5)   | O(20)-Mn(5)-O(14)    | 179.1(4)  |
| O(1)-Mn(2)-O(18)    | 88.5(5)   | O(3)-Mn(4)-O(8)   | 93.7(4)   | Mn(2)-O(2)-Mn(1)     | 116.7(5)  |
| O(2)-Mn(2)-O(18)    | 90.4(4)   | O(7)-Mn(4)-O(8)   | 169.6(4)  | Mn(4)-O(3)-Mn ( 1 )  | 121.6(5)  |
| O(5)-Mn(2)-O(18)    | 90.7(5)   | N(3)-Mn(4)-O(8)   | 82.6(4)   | Mn(2)-O(5)-Mn ( 3 )  | 126.5(5)  |
| N(1)-Mn(2)-O(18)    | 88.6(5)   | O(3)-Mn(4)-O(21)  | 97.5(4)   | Mn(5)-O(8)-Mn ( 4 )  | 127.2(5)  |
| O(1)-Mn(2)-O(15)    | 85.9(4)   | O(7)-Mn(4)-O(21)  | 93.1(4)   | Mn(3)-O(12)-Mn ( 1 ) | 122.7(5)  |
| O(2)-Mn(2)-O(15)    | 95.2(4)   | N(3)-Mn(4)-O(21)  | 93.1(4)   | Mn(5)-O(19)-Mn ( 1 ) | 118.5(5)  |

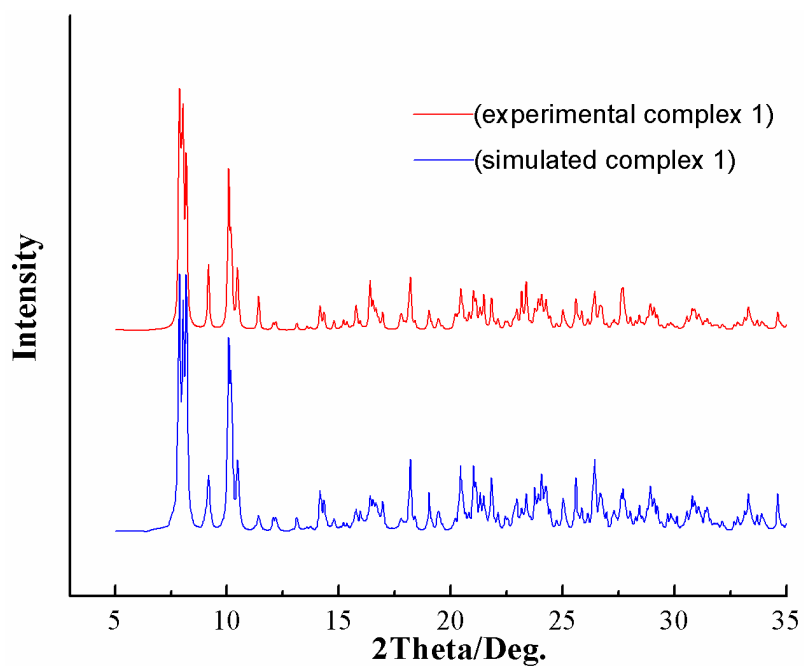

**Figure S1.** The XRD patterns of complex 1.

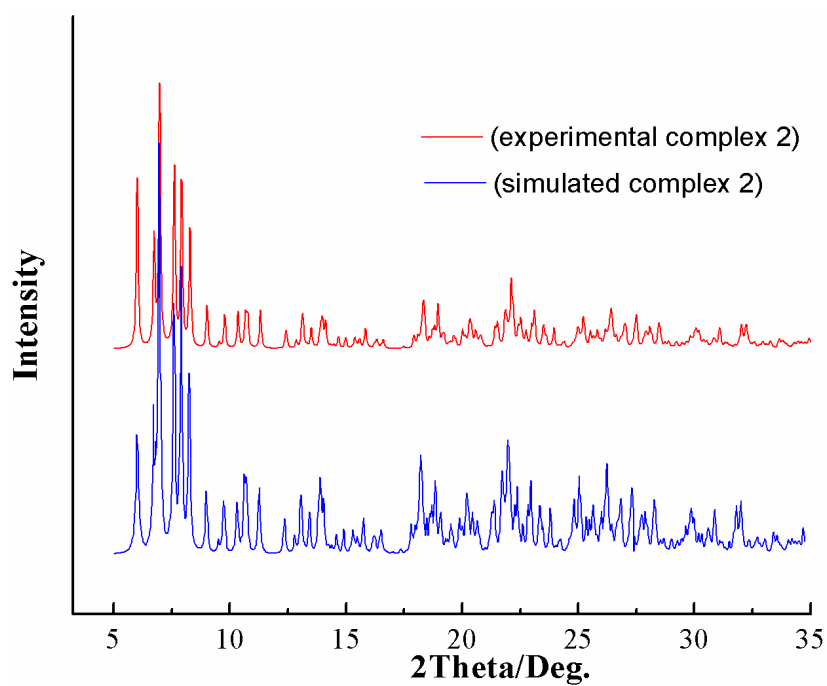

**Figure S2.** The XRD patterns of complex 2.

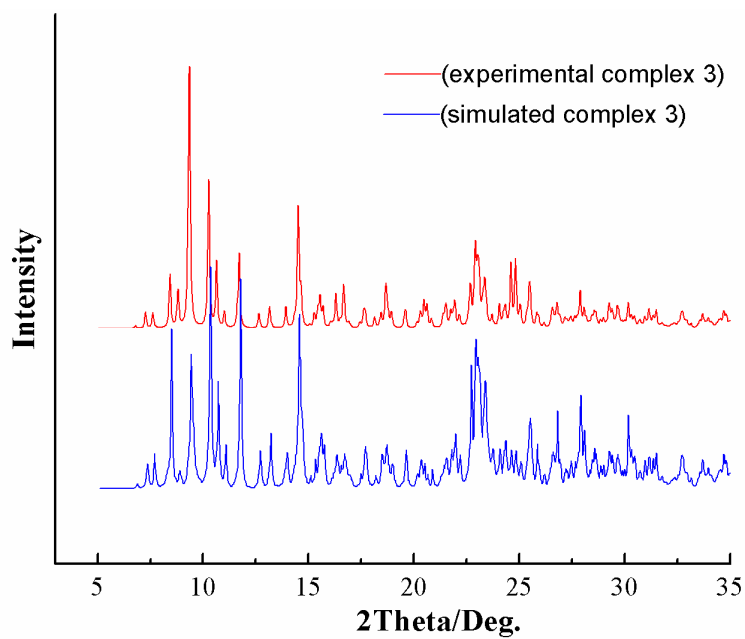

**Figure S3.** The XRD patterns of complex 3.

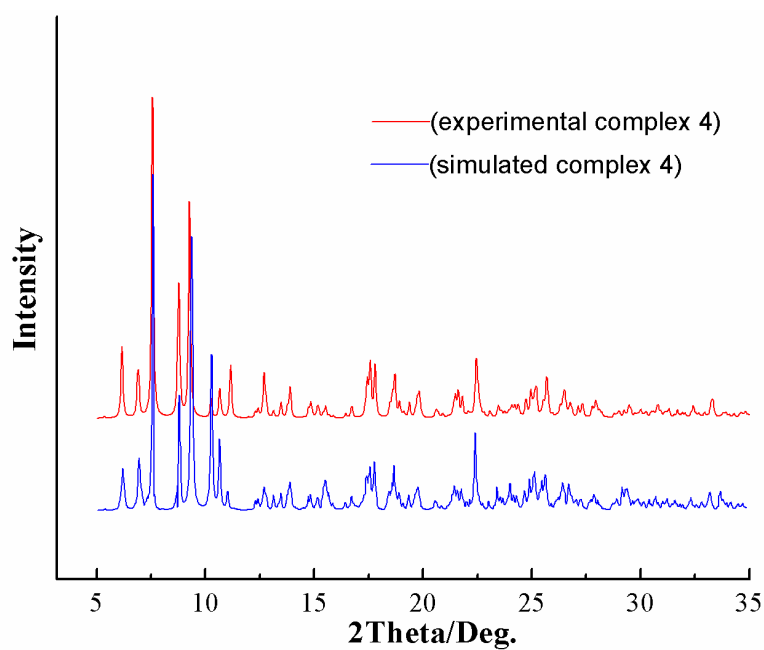

**Figure S4.** The XRD patterns of complex 4.

Packing diagrams (Fig. S5 to Fig. S8) reveal the presence of intercluster  $\pi$ - $\pi$  supramolecular interaction between the phenyl rings of the neighboring clusters in complexes **1-4**.

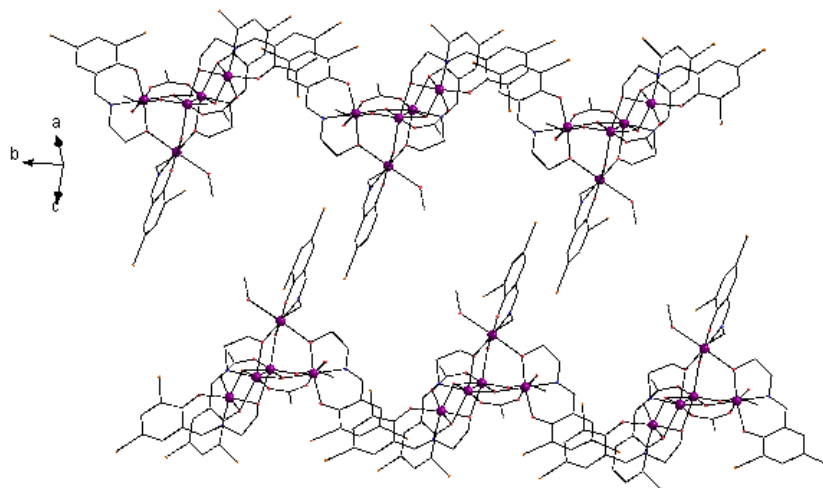

**Fig. S5.** The molecular packing structure of complex **1** (H atoms and solvent molecules are omitted for clarity).

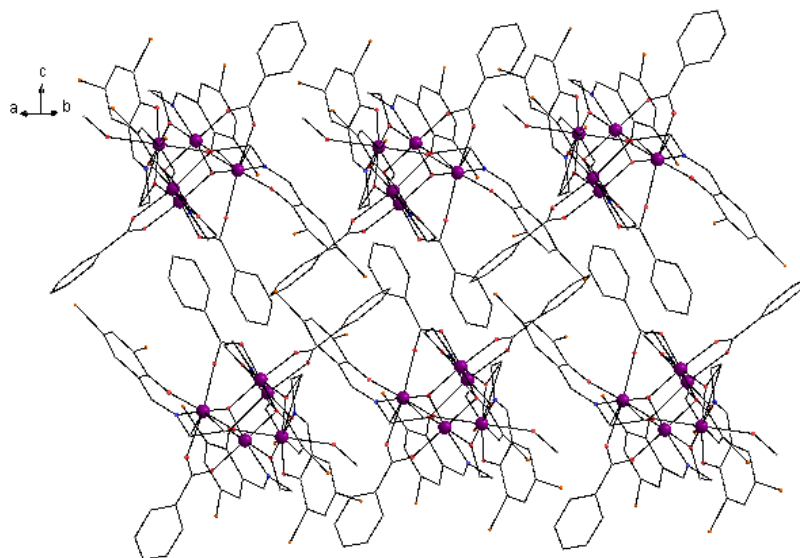

**Fig. S6.** The molecular packing structure of complex **2** (H atoms and solvent molecules are omitted for clarity).



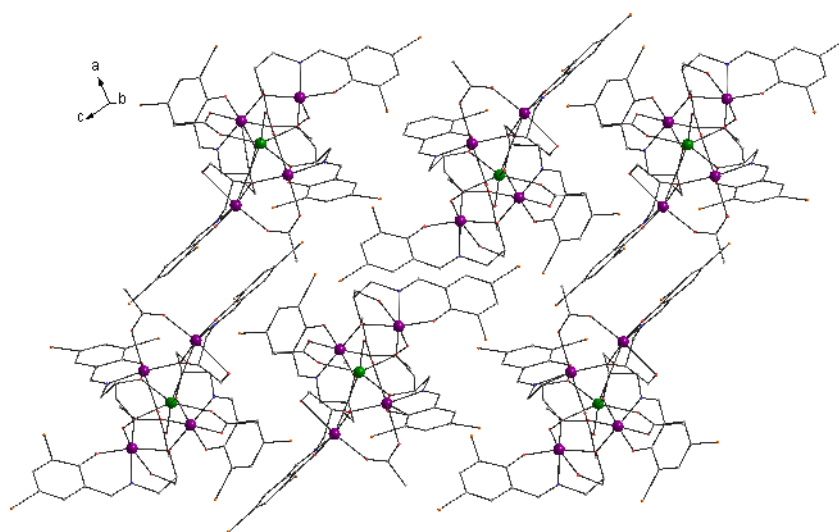

**Fig. S7.** The molecular packing structure of complex **3** (H atoms and solvent molecules are omitted for clarity).

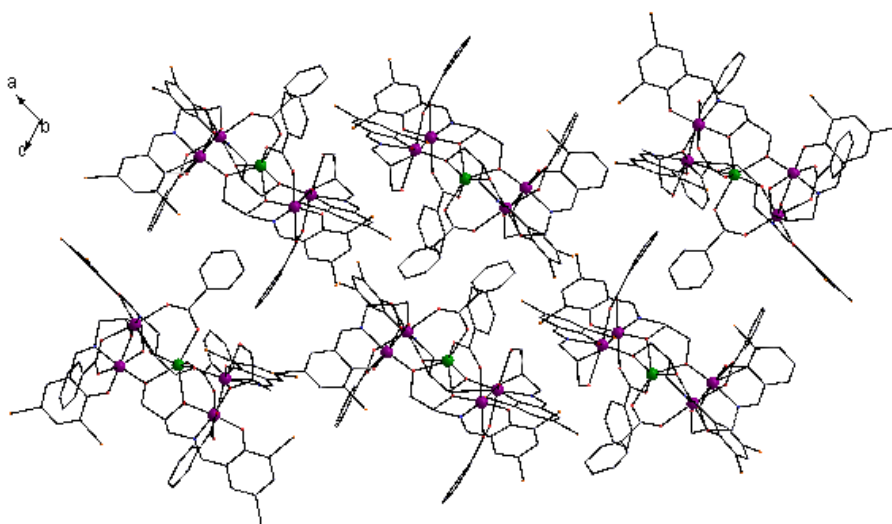

**Fig. S8.** The molecular packing structure of complex **4** (H atoms and solvent molecules are omitted for clarity).

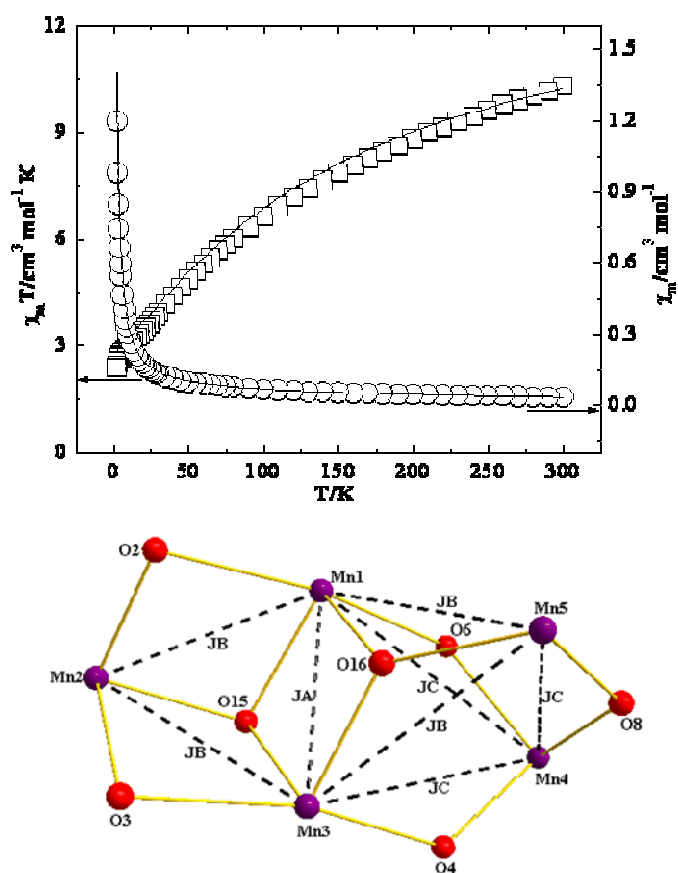

**Fig. S9.** (top) Temperature dependence of  $\chi_m$  ( $\circ$ ) and  $\chi_m T$  ( $\square$ ) values for **2**. The solid lines correspond to the best-fit curves using the parameters described in the text. (bottom) Spin topology for **2** assuming three different  $J$  values.

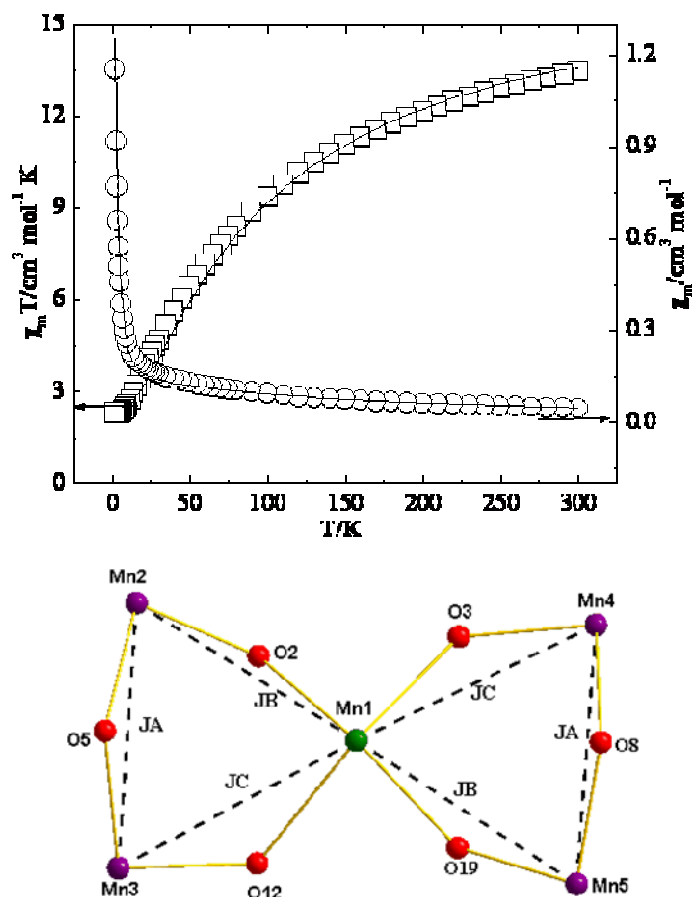

**Fig. S10.** (top) Temperature dependence of  $\chi_m$  ( $\circ$ ) and  $\chi_m T$  ( $\square$ ) values for **4**. The solid lines correspond to the best-fit curves using the parameters described in the text. (bottom) Spin topology for **4** assuming three different  $J$  values.
